# Supplementary material
Source: PubMed Central journal article supplement (PMC3140910)
Supplement: NIHMS301520-supplement-01.pdf [file NIHMS301520-supplement-01.pdf]

**Table S1. Bacterial Taxa Whose Representation Significantly Correlates with the Enhanced Colitogenic Fecal Microbiota of Inflammasome-Deficient Mice**

The header for each column in the Table provides a description of housing conditions and genotypes of various groups of mice that are described in the main text and the indicated main text Figure. Note that the single-caged WT mice listed in each column are specifically those WT mice used as controls for the set of experiments involving the indicated knockout animals that were cohoused with WT. Genotypes and housing conditions that resulted in an enhanced colitogenic microbiota are indicated by a ‘Yes’ followed by the total number of mice within the groups represented in the column that exhibited this phenotype. None of members of any of the groups in any of the columns shown in the Table were exposed to DSS prior to fecal sampling and 16S rRNA-based analysis. The representation of various phylogenetic groups of bacteria in the fecal microbiota of mice belonging to the groups indicated within a column header are noted. Representation is expressed the mean percentage of total OTUs assigned to the indicated taxon. If the number of animals in which that taxon is present is less than the total number of mice indicated after a ‘No’ or ‘Yes’ in the column header then that number is shown in parenthesis within the cell. The significance of the difference in representation of a taxon between different groups of mice was determined using ANOVA and G-test after FDR correction for multiple hypotheses. n.s.=Not significant, n.d.=not determined.
